# Supplementary material for: Highly parallelized droplet cultivation and prioritization of antibiotic producers from natural microbial communities
Source: eLife journal article supplement (doi:10.7554/elife.64774), 2021-03-25
Supplement: fig3-data1 [file elife-64774-fig3-data1-v2.rdata]

Archive with 1 entries (1 files):
- elife-64774-fig3-data1-v2.rdata.out
