# Supplementary material for: Highly parallelized droplet cultivation and prioritization of antibiotic producers from natural microbial communities
Source: eLife. 2021 Mar 25;10:e64774. doi: 10.7554/eLife.64774 (PMC8081529; doi:10.7554/eLife.64774)
Supplement: Figure 5—source data 1. [file elife-64774-fig5-data1.csv]

Genus	count	rel. Abund
Agromyces	4	1.503759398
Bacillus	139	52.2556391
Enhydrobacter	1	0.37593985
Escherichia	21	7.894736842
Fictibacillus	3	1.127819549
Kocuria	2	0.751879699
Leifsonia	13	4.887218045
Micrococcus	1	0.37593985
Micromonospora	61	22.93233083
Paenibacillus	20	7.518796992
Cytophagaceae_uncultured	1	0.37593985
