# Supplementary figures and images for: Highly parallelized droplet cultivation and prioritization of antibiotic producers from natural microbial communities
Source: eLife journal article supplement (doi:10.7554/elife.64774), 2021-03-25

## A - exclusive taxa

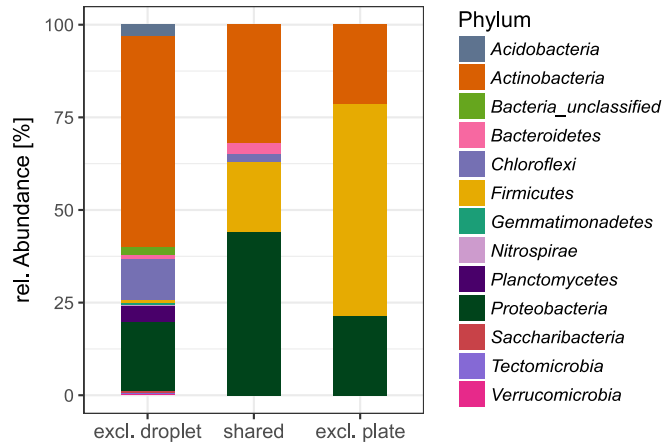

absolute number

983

681

28

covered phyla

13

6

3

## B - uncultured taxa

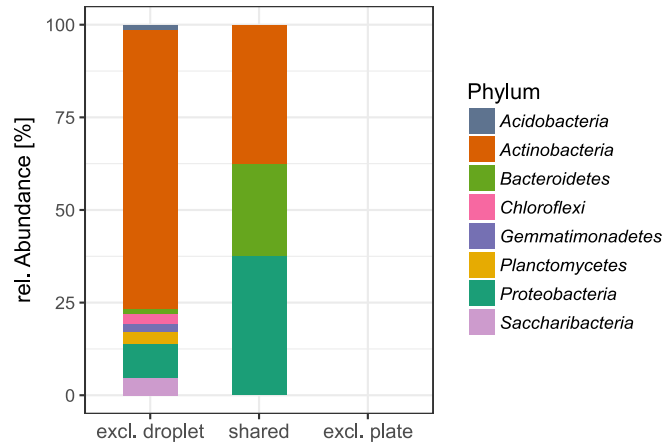

151

8

0

8

3

0

Supplement: supp [file elife-64774-supp-v1.zip]

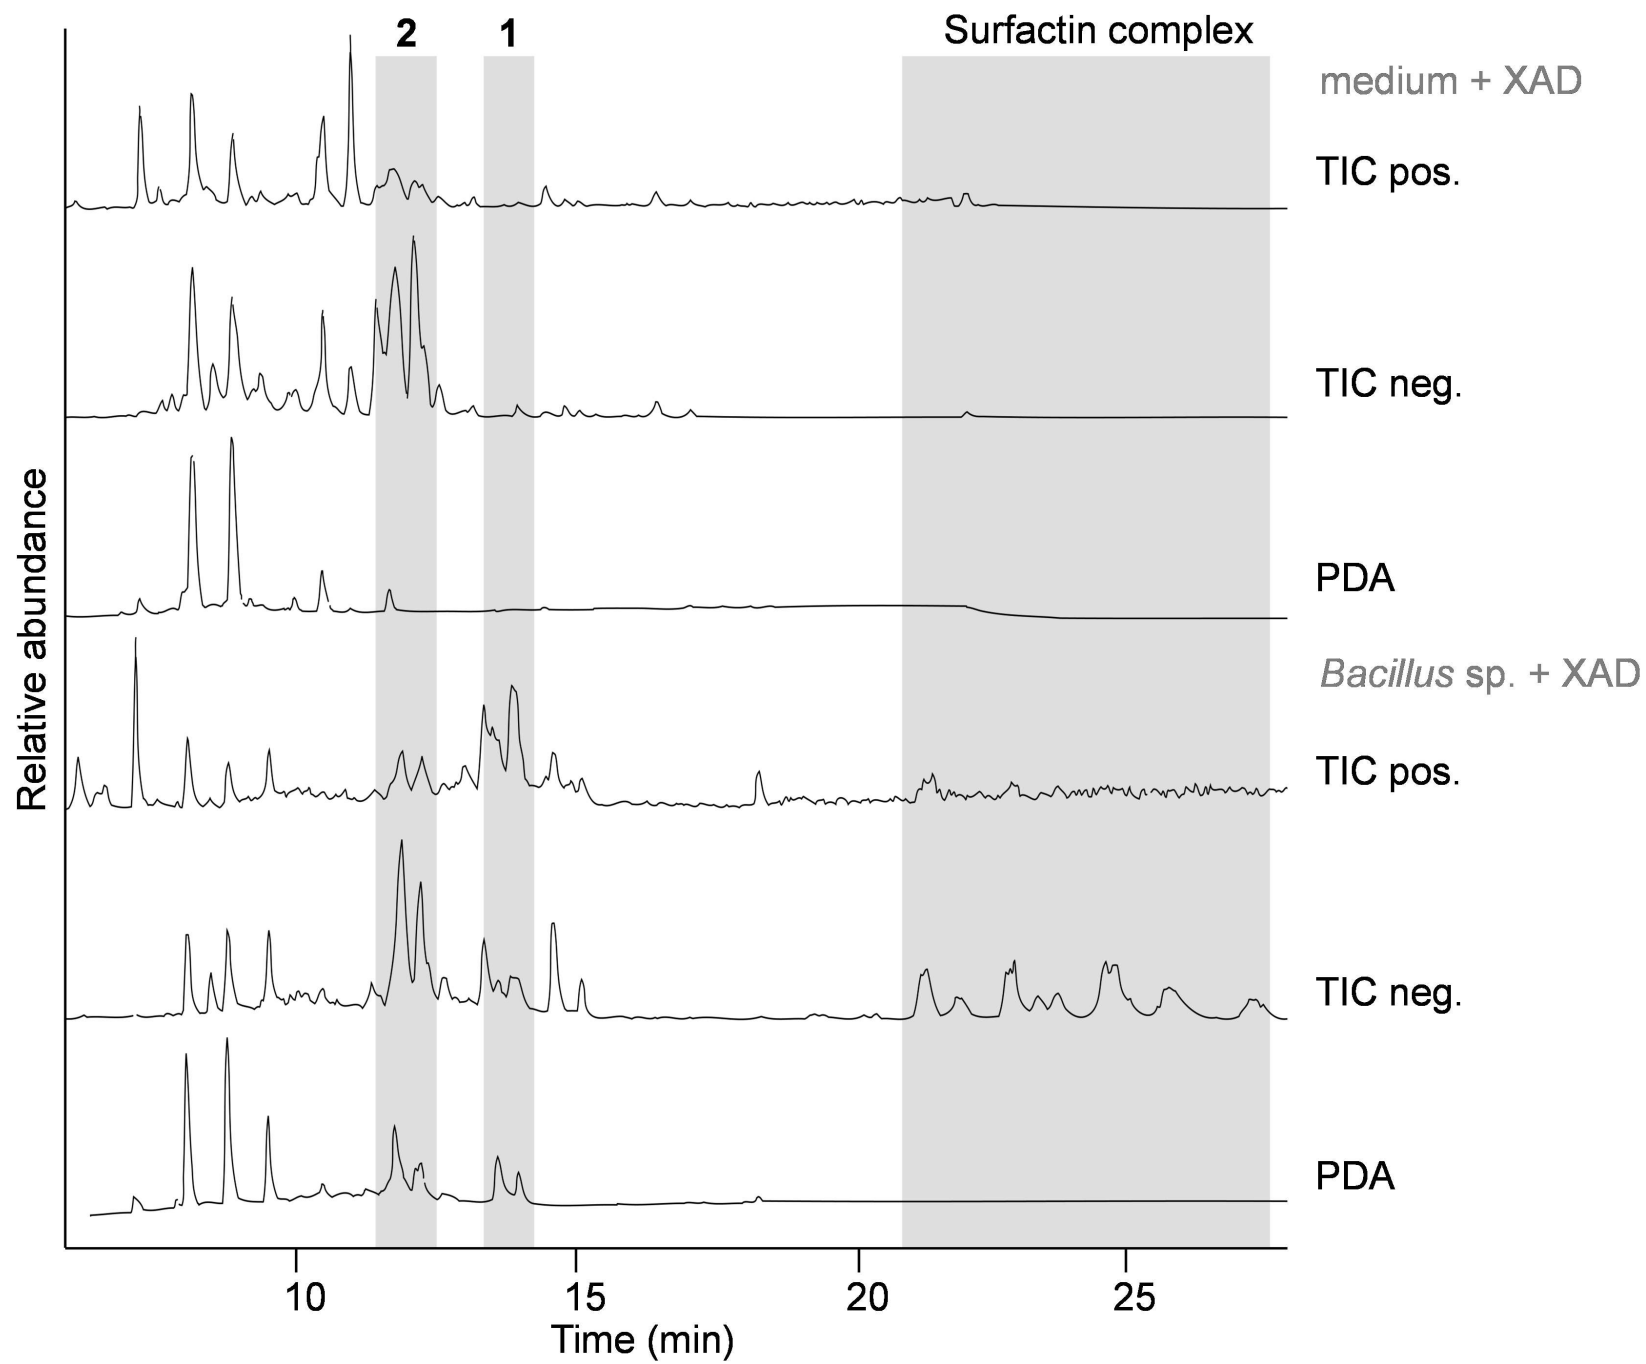

Supplement: supp [file elife-64774-supp-v1.zip]

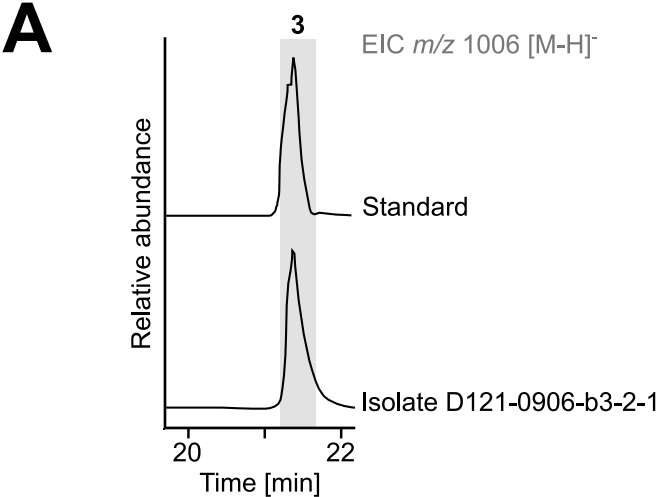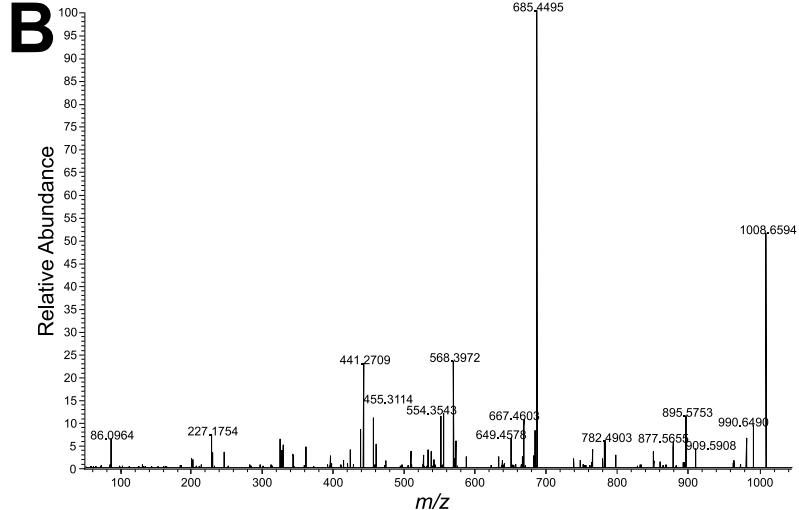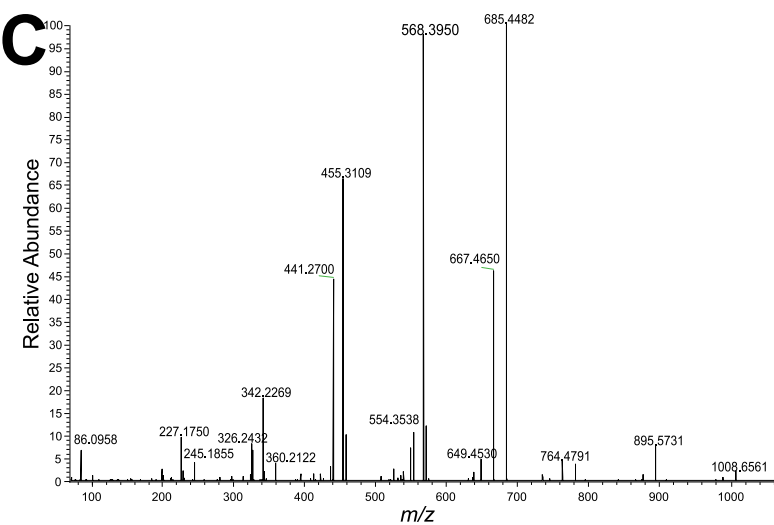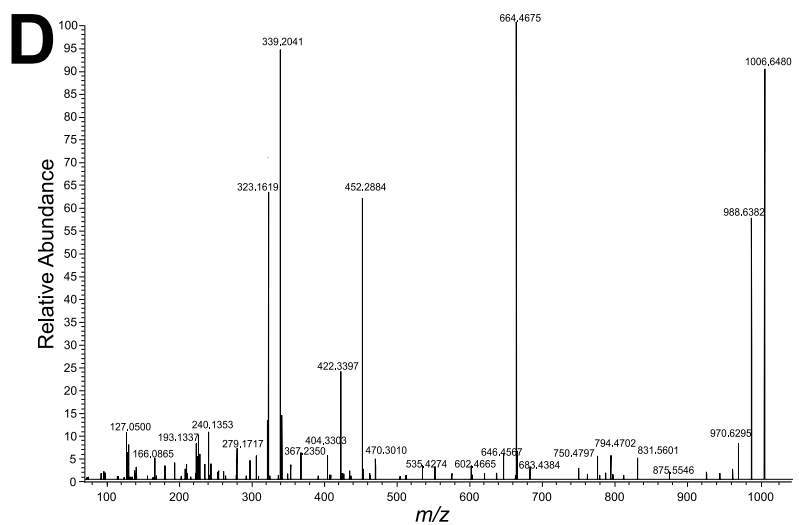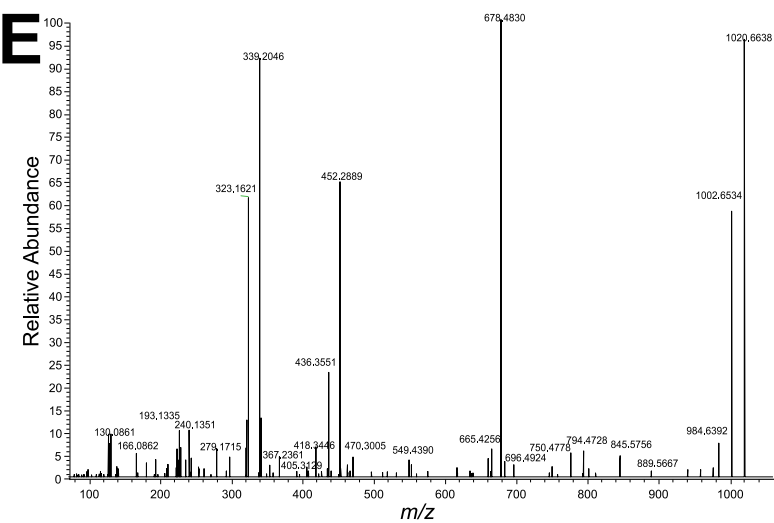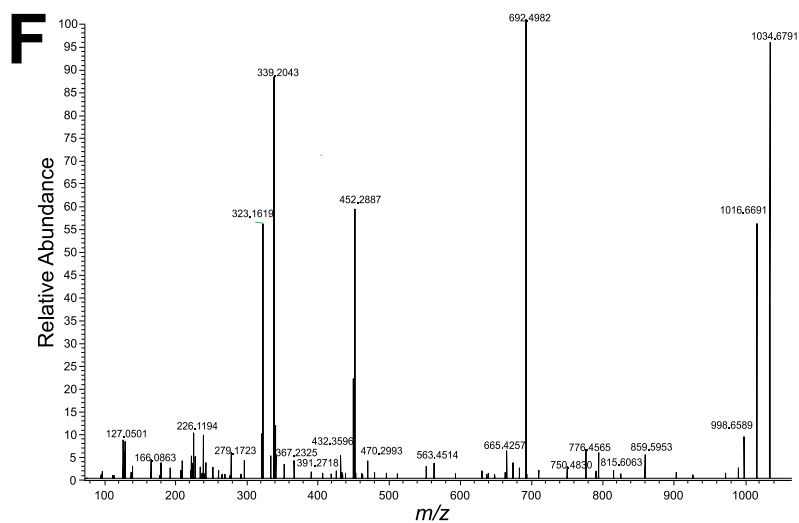

Supplement: supp [file elife-64774-supp-v1.zip]

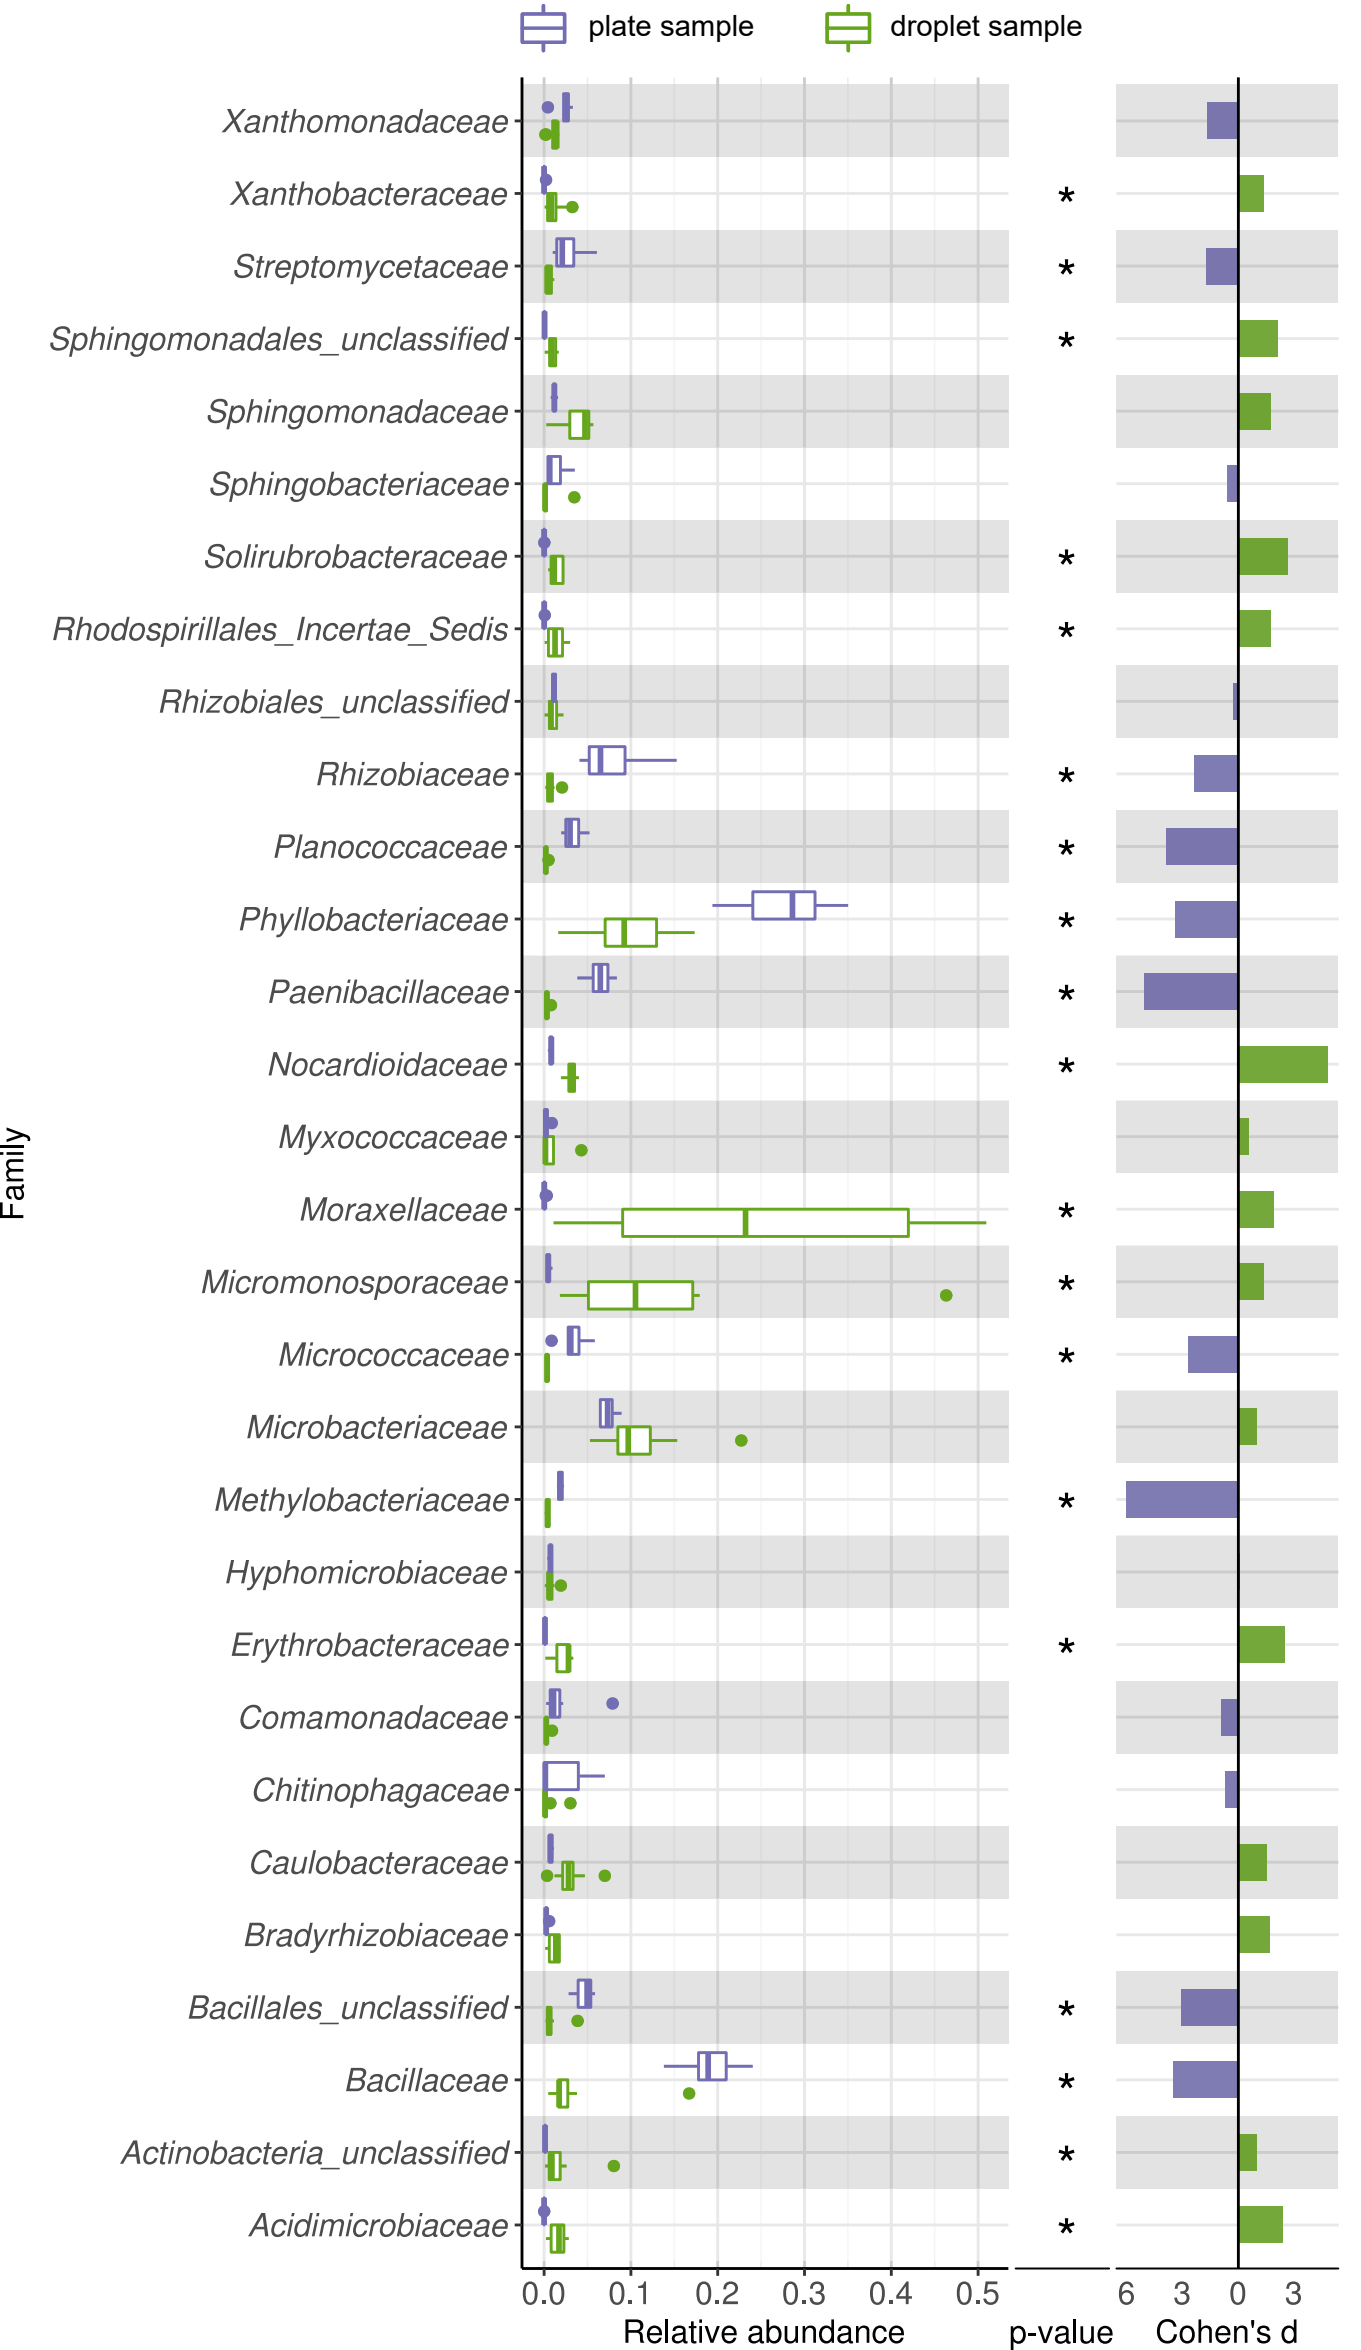

Supplement: supp [file elife-64774-supp-v1.zip]

*Bacillus subtilis*

A

D

E

G

B

C

H

F

Cip

MeOH

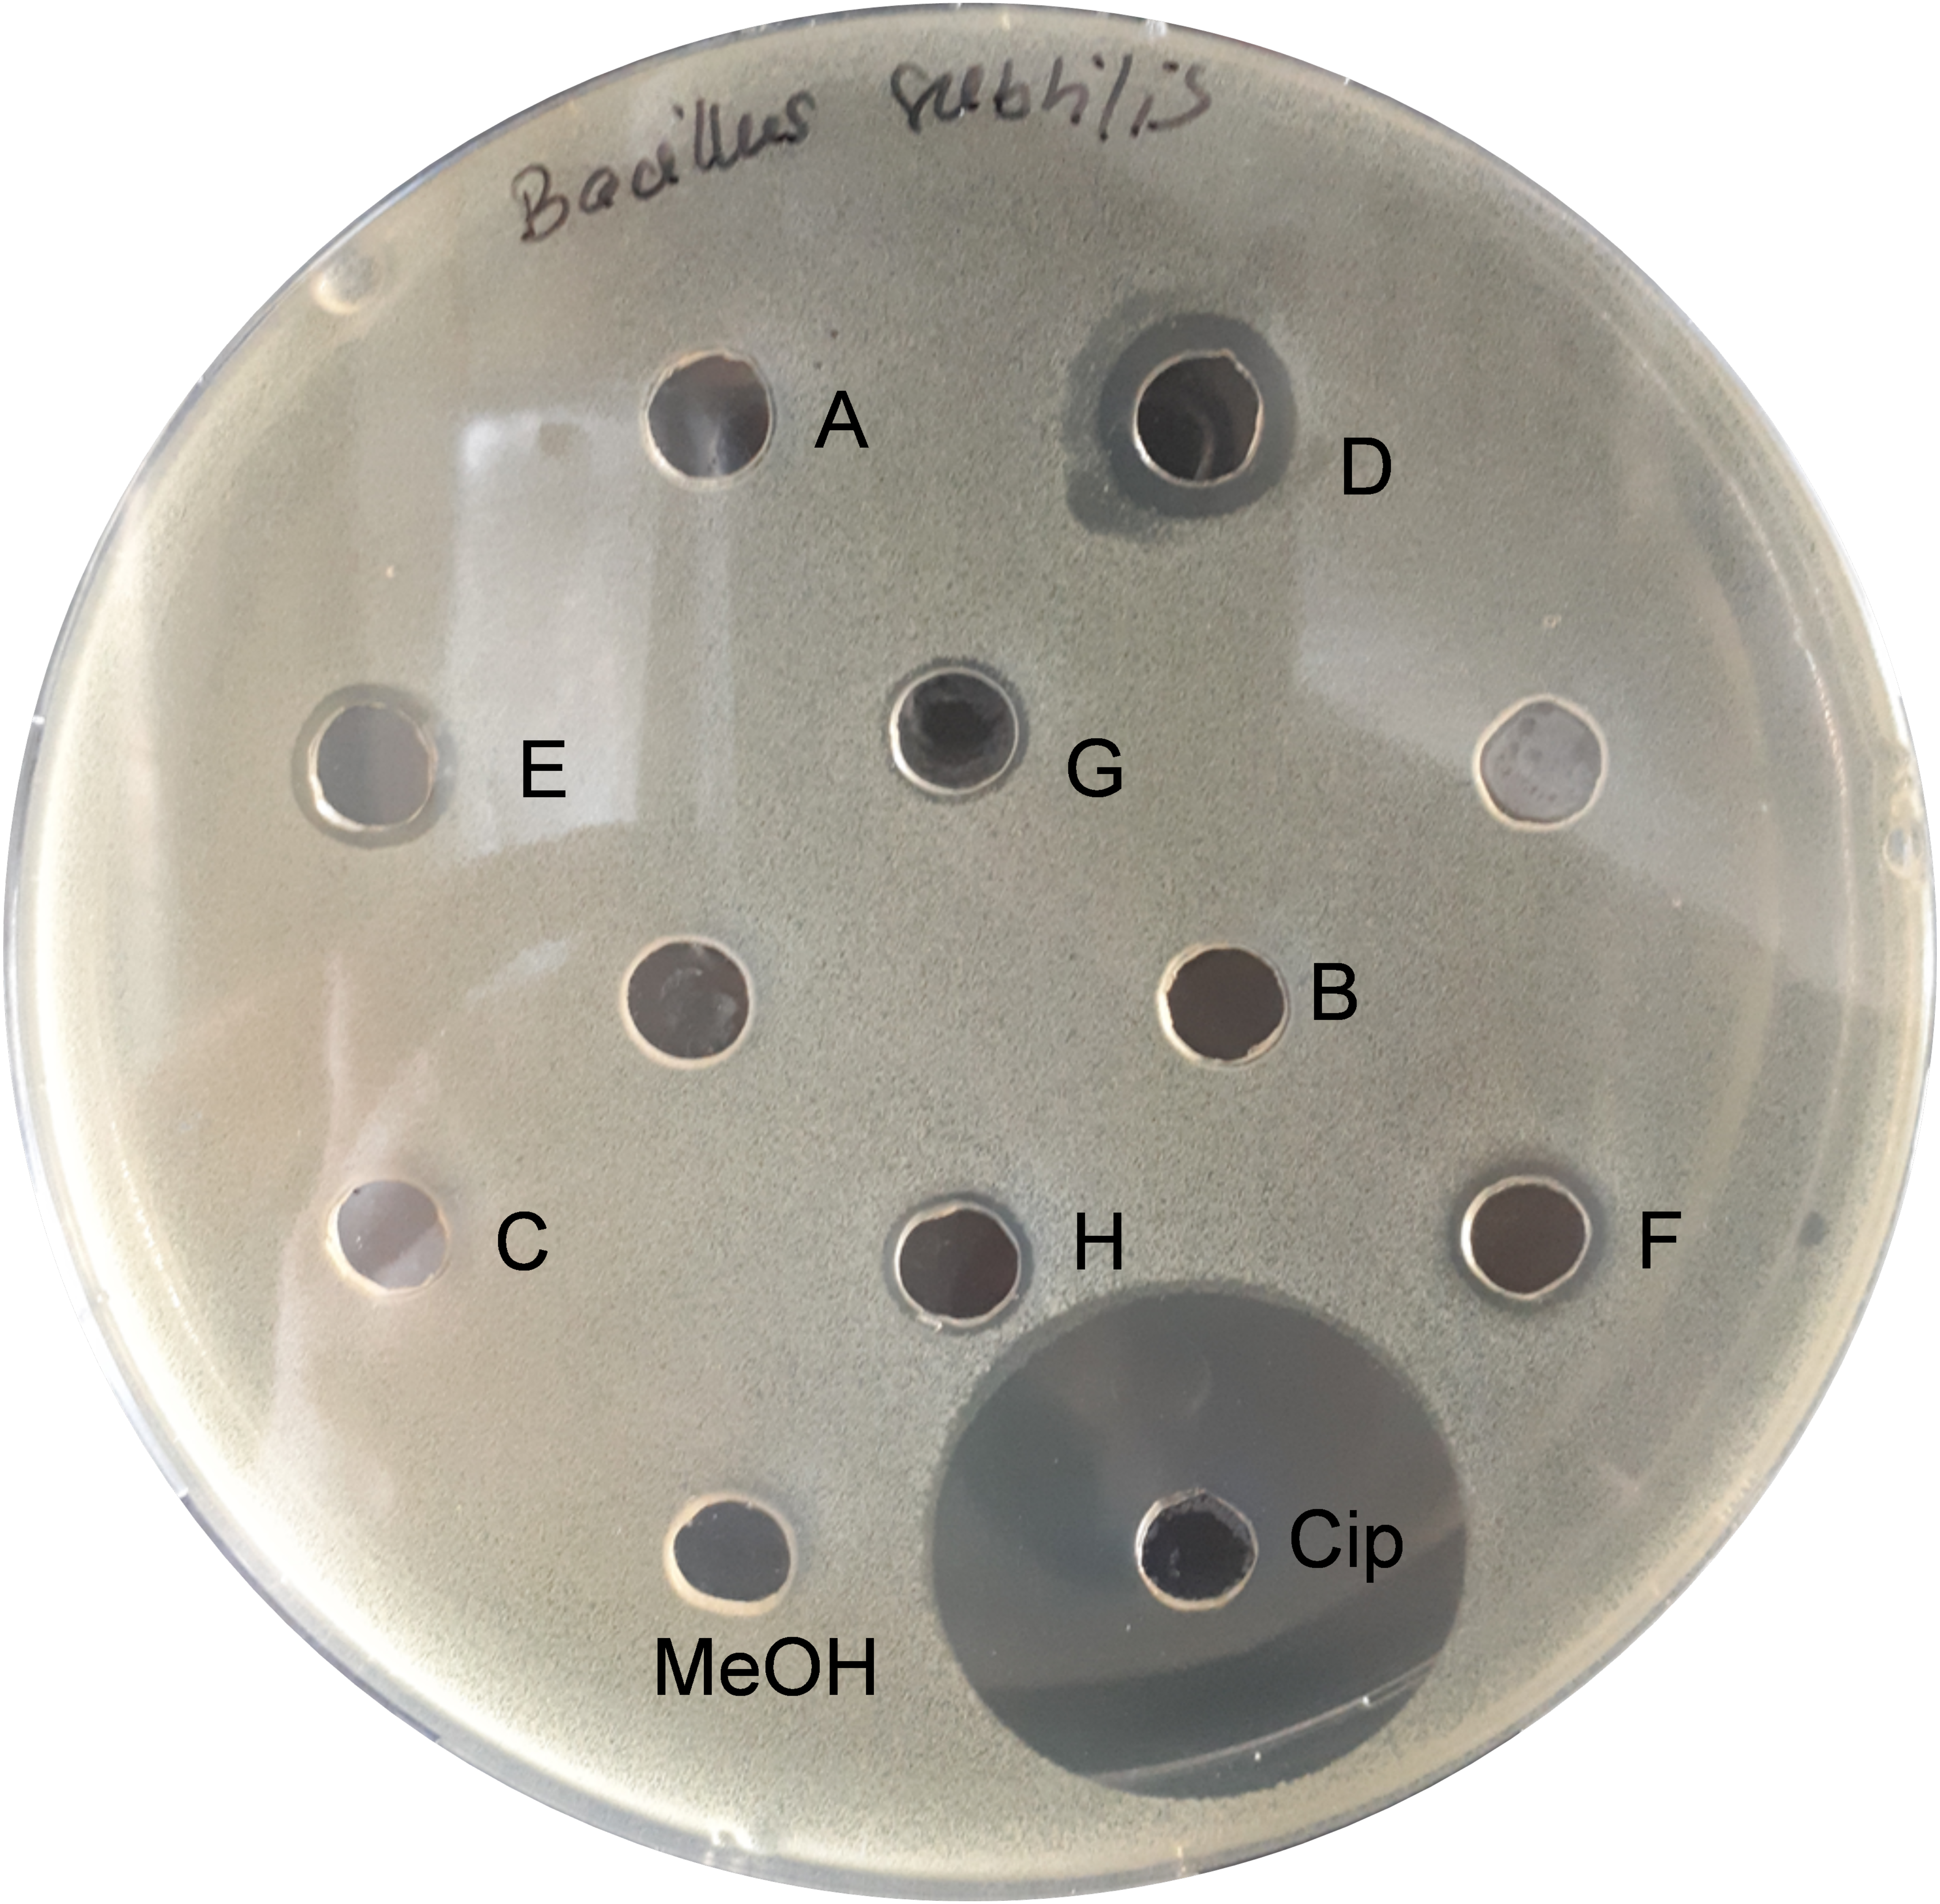

Supplement: supp [file elife-64774-supp-v1.zip]

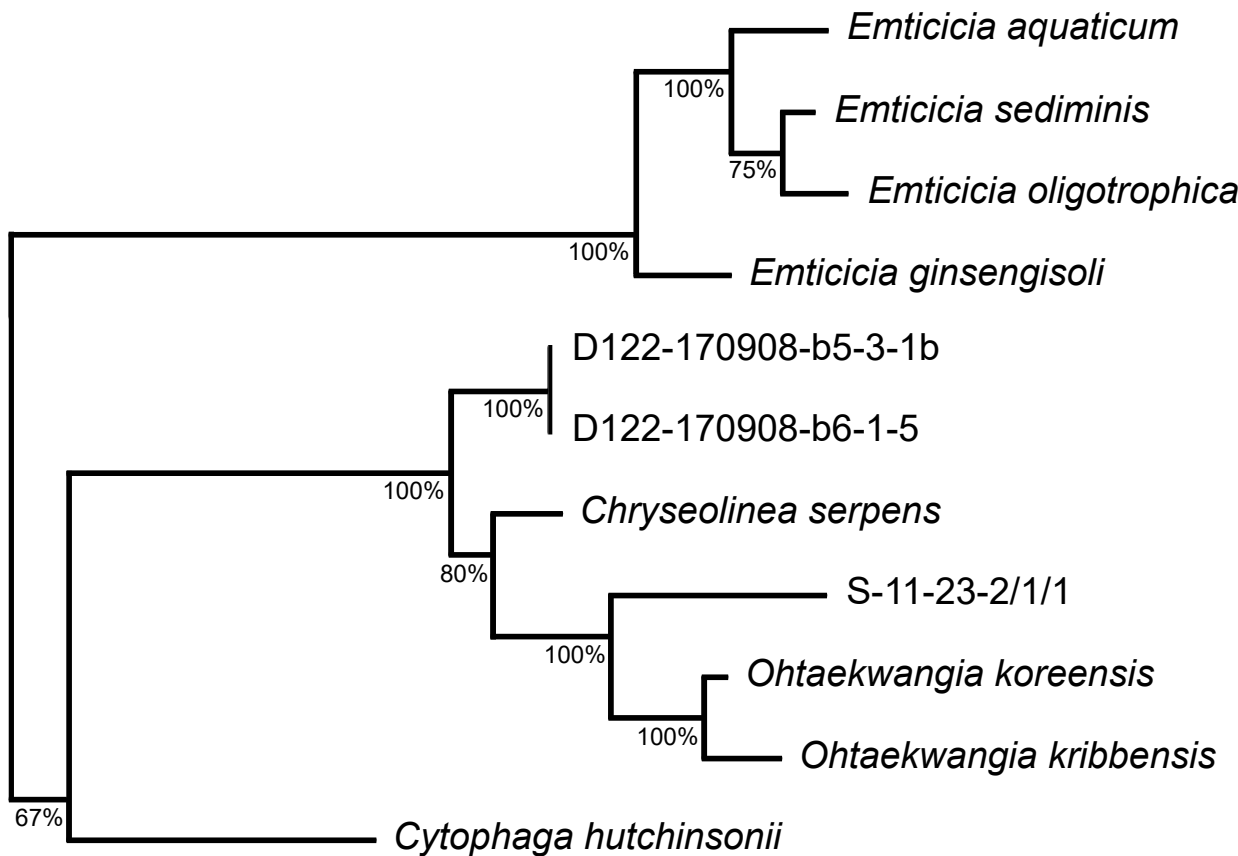

0,1

Supplement: supp [file elife-64774-supp-v1.zip]

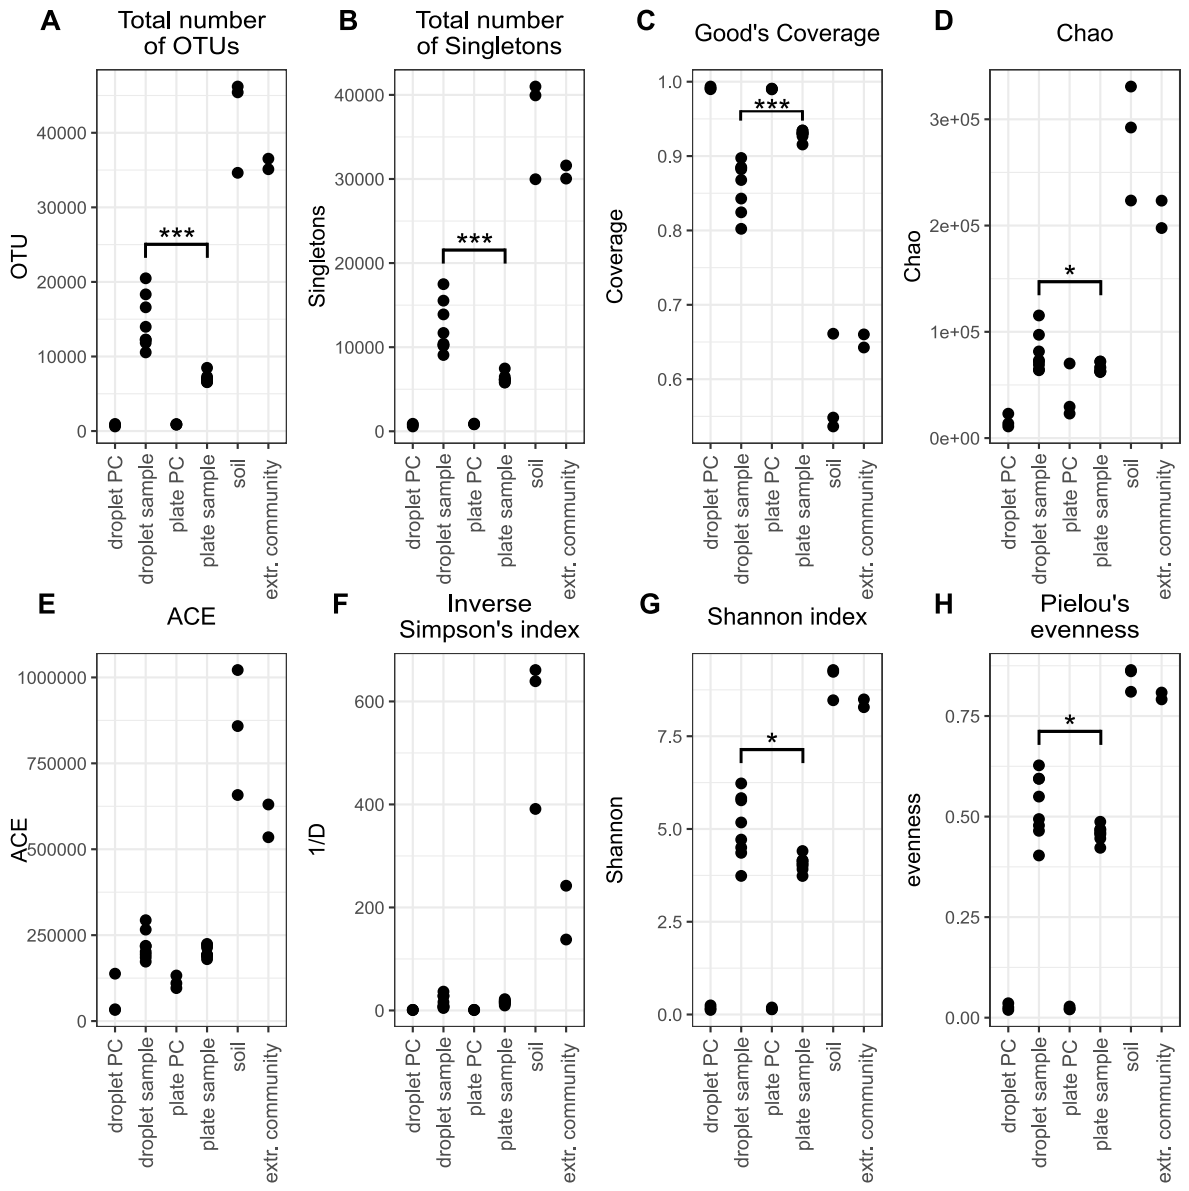

Supplement: supp [file elife-64774-supp-v1.zip]

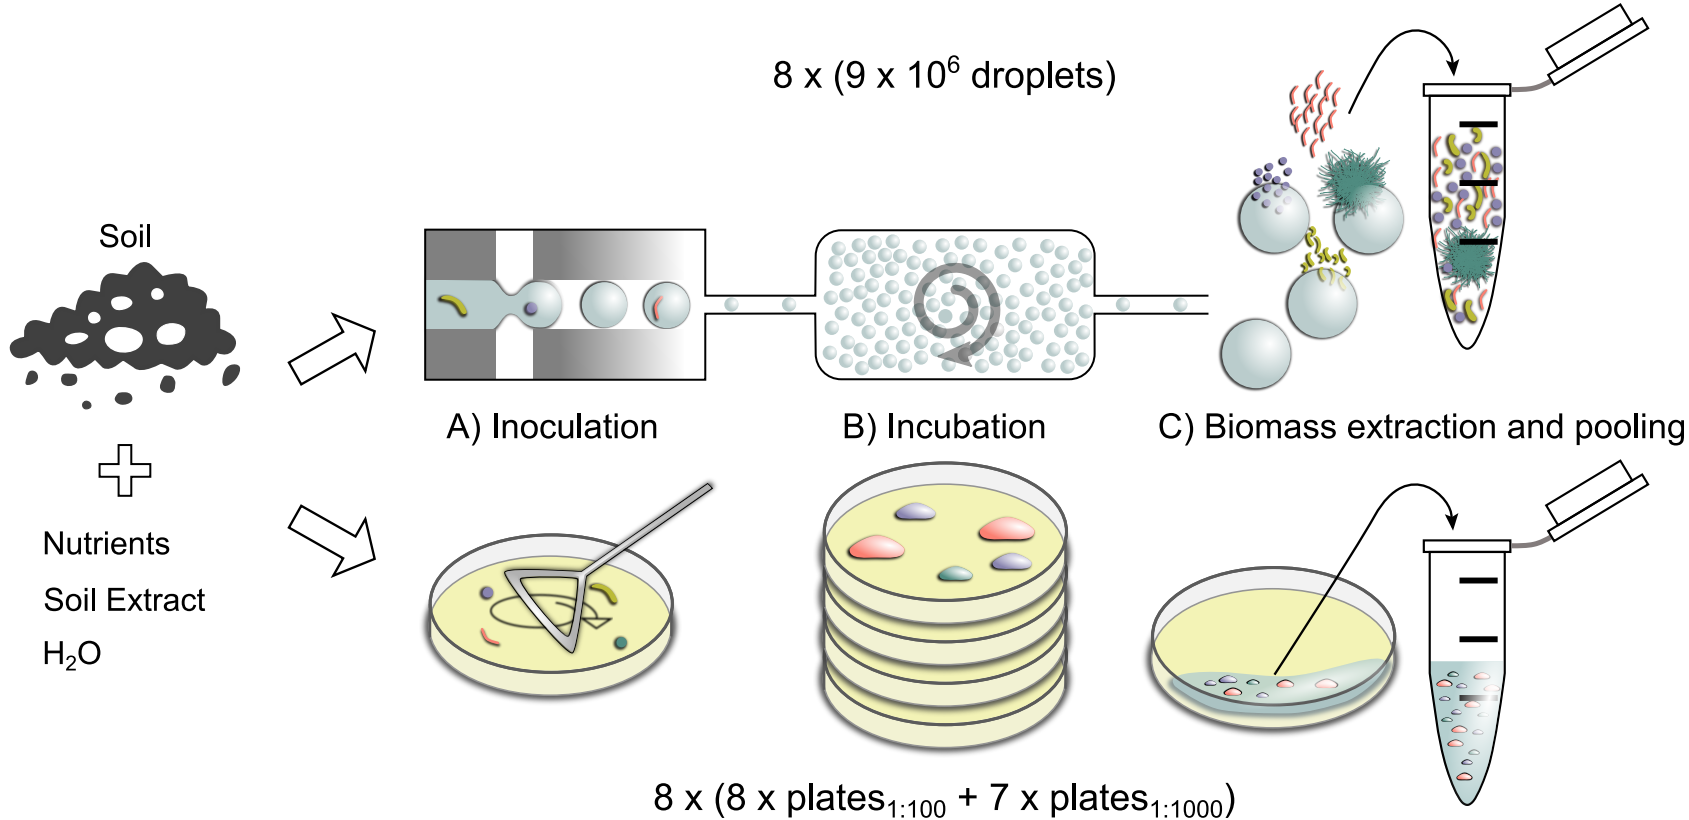

Supplement: supp [file elife-64774-supp-v1.zip]

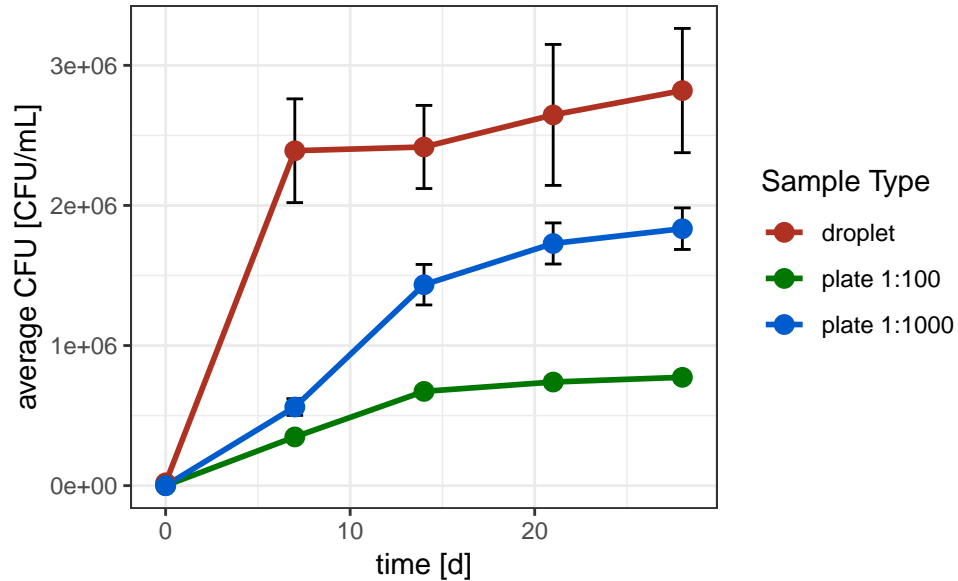

Supplement: supp [file elife-64774-supp-v1.zip]

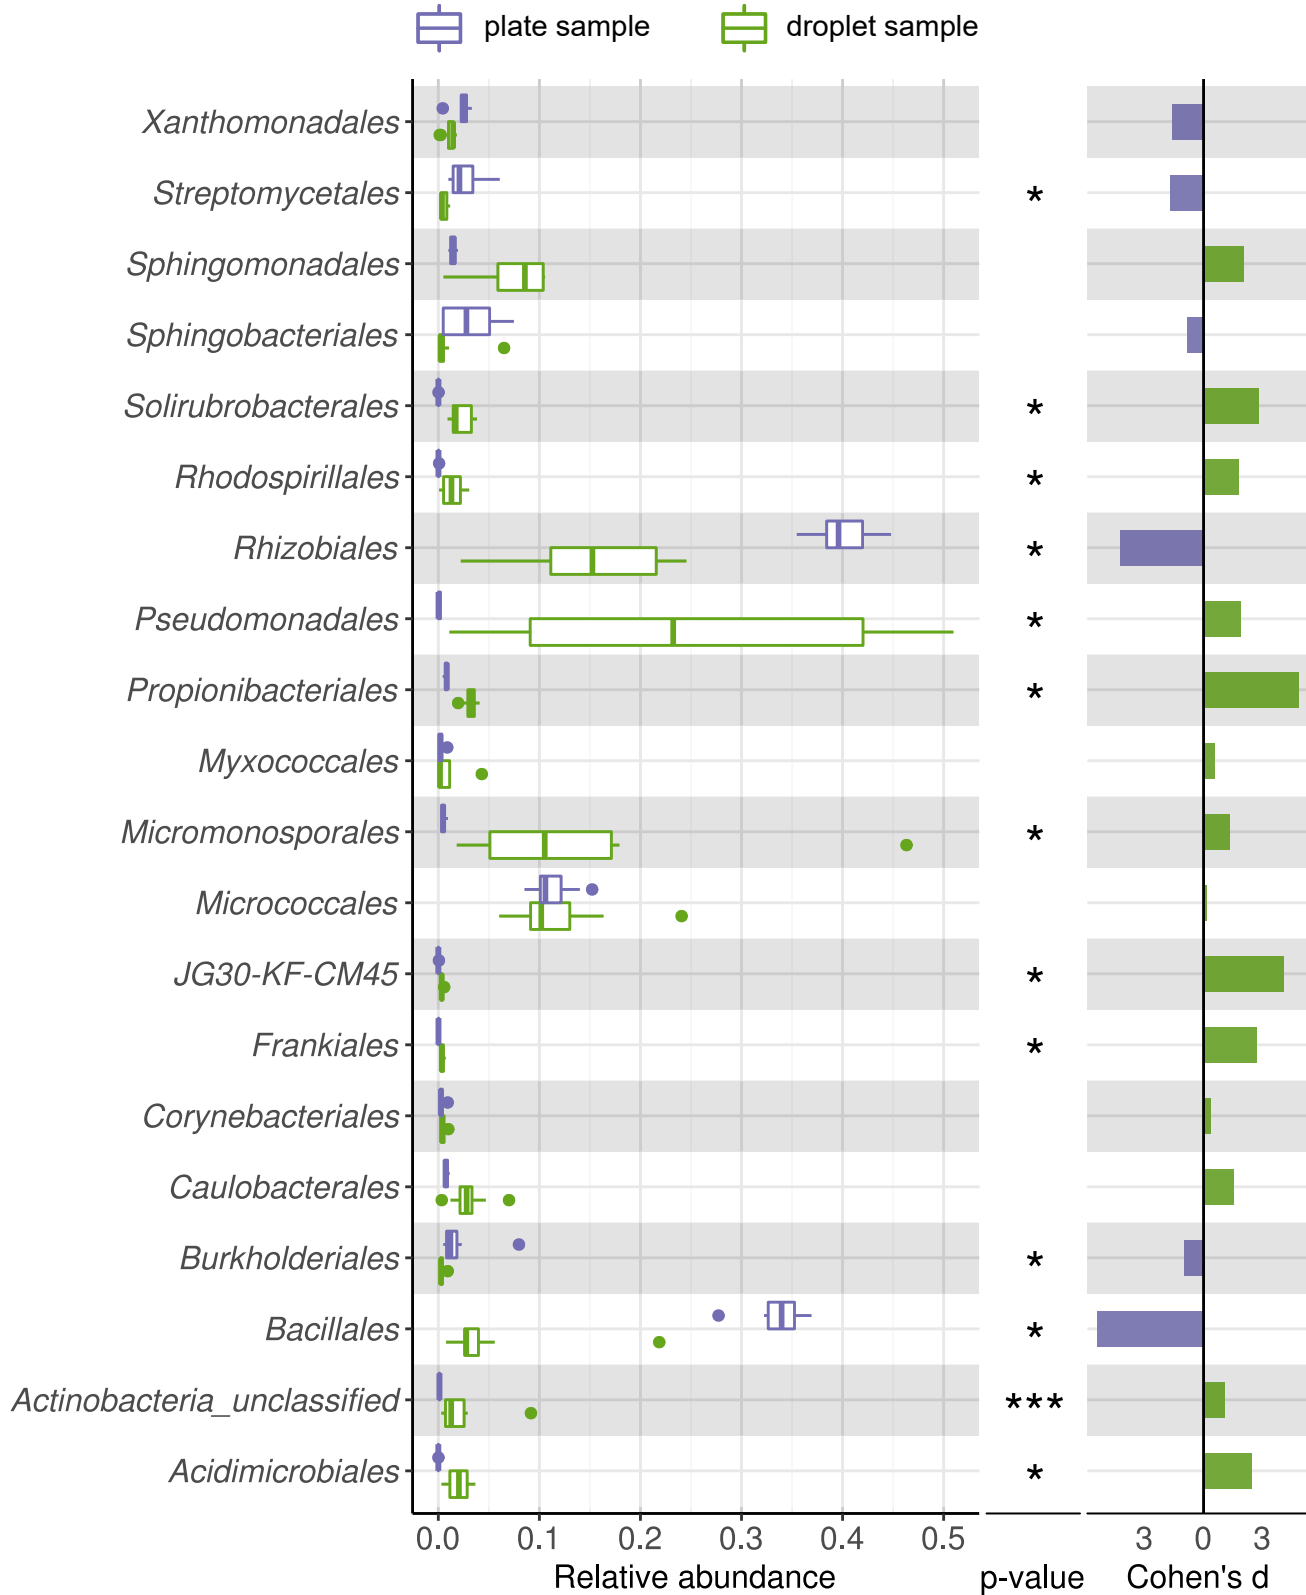

Supplement: supp [file elife-64774-supp-v1.zip]

**A**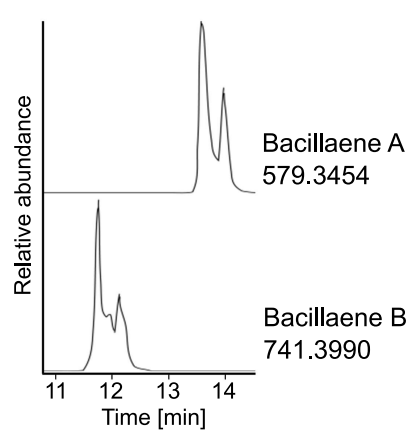**B**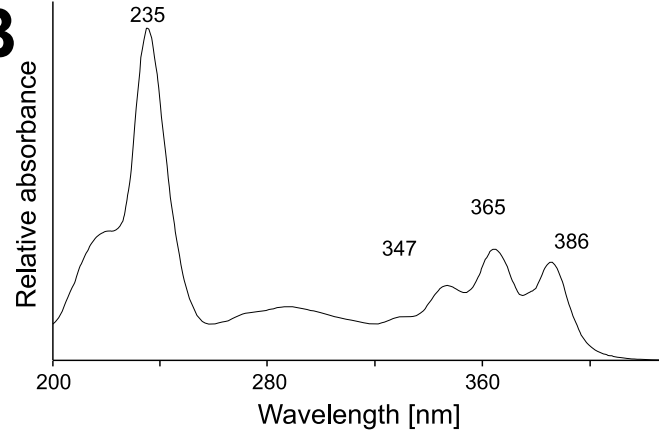**C**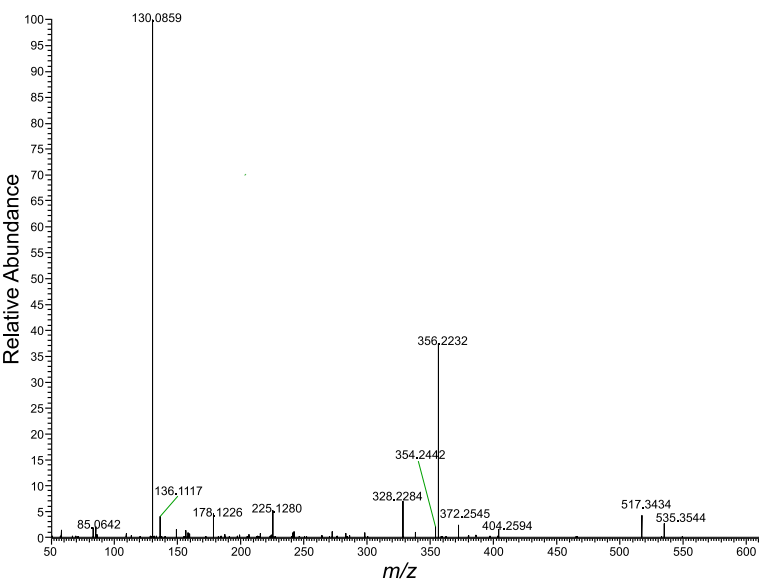**D**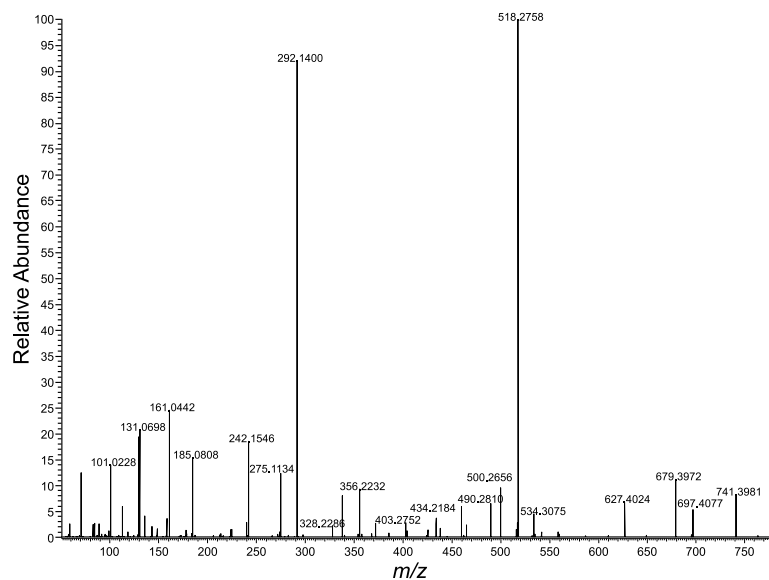**E**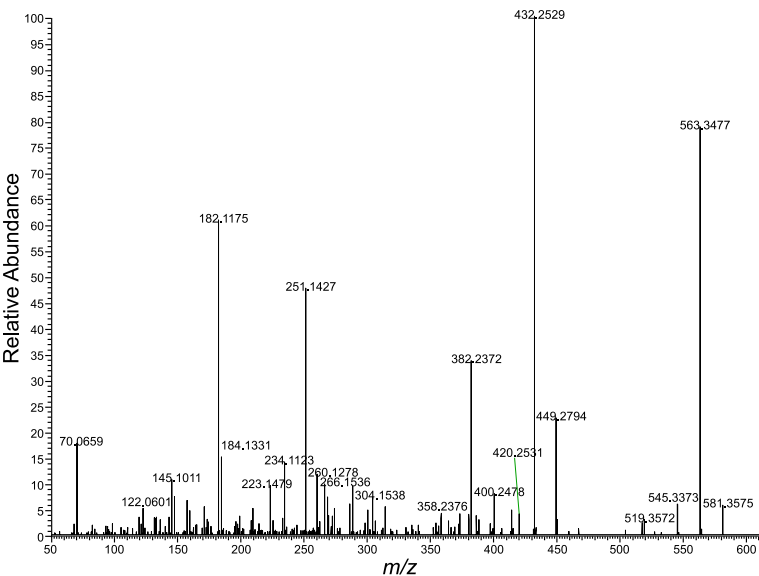**F**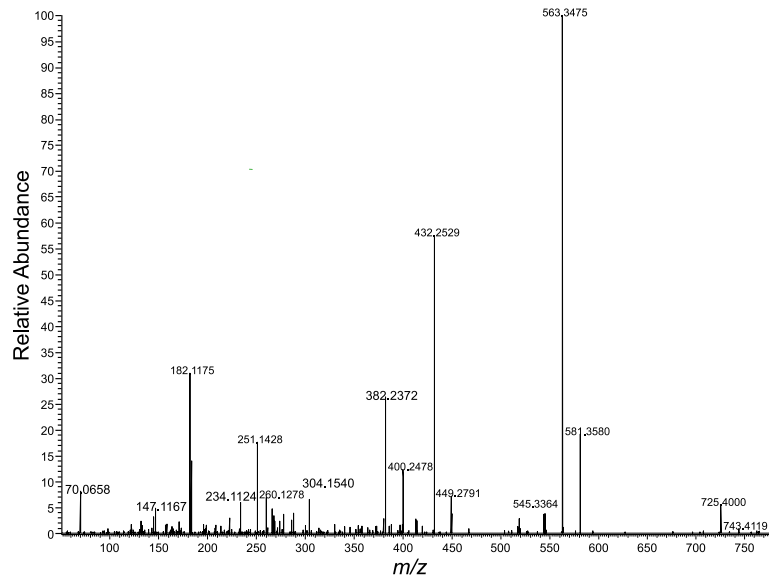

Supplement: supp [file elife-64774-supp-v1.zip]

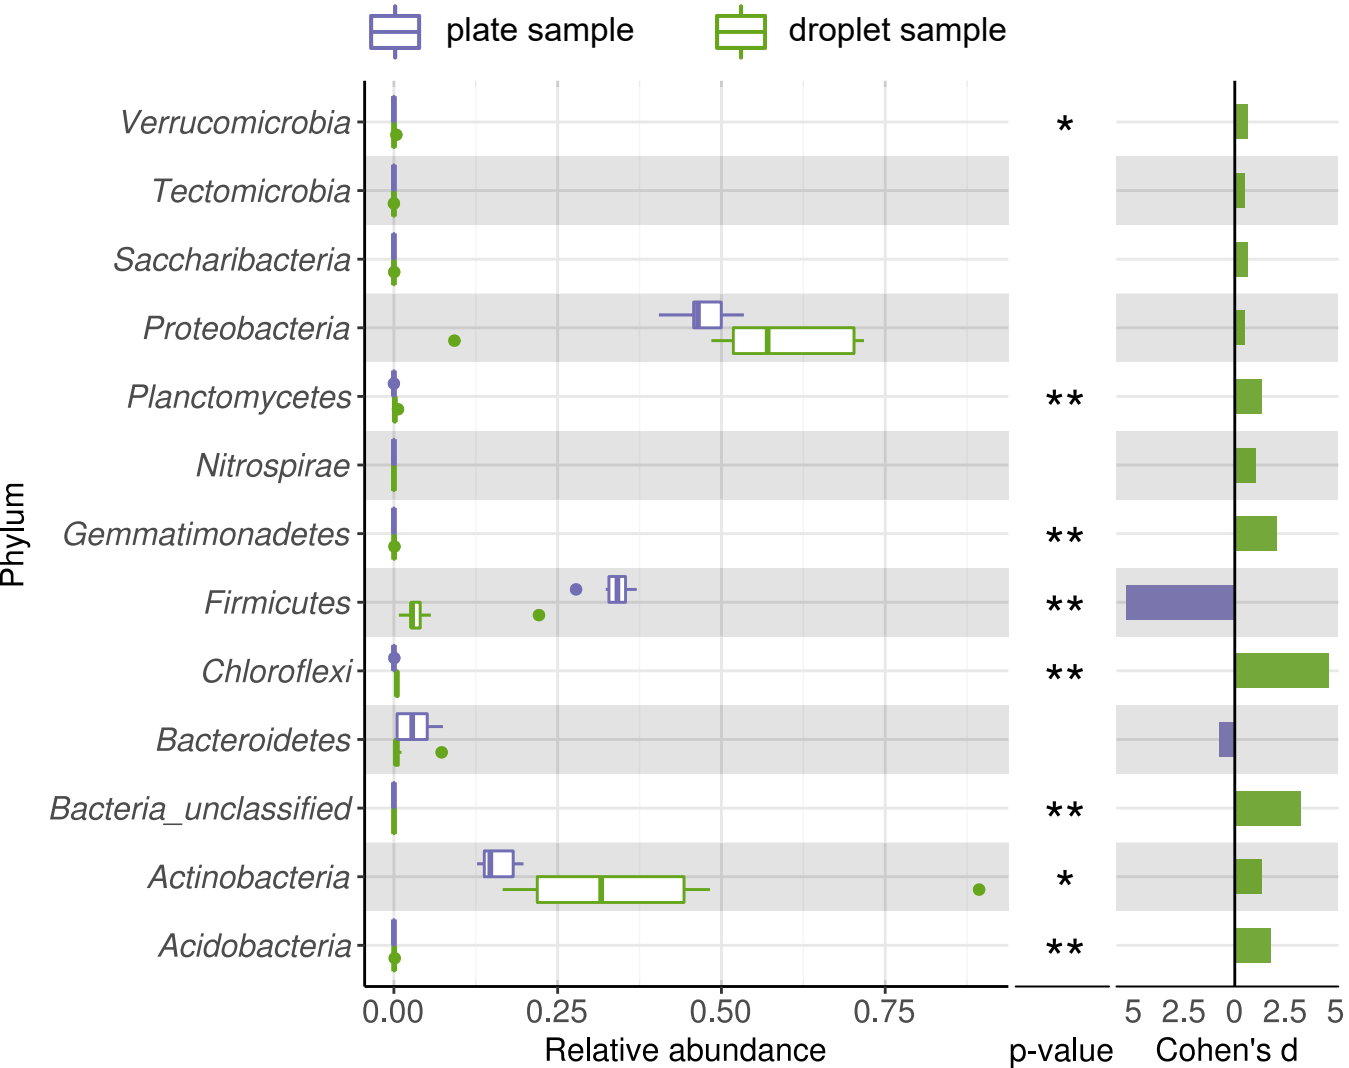

Supplement: supp [file elife-64774-supp-v1.zip]

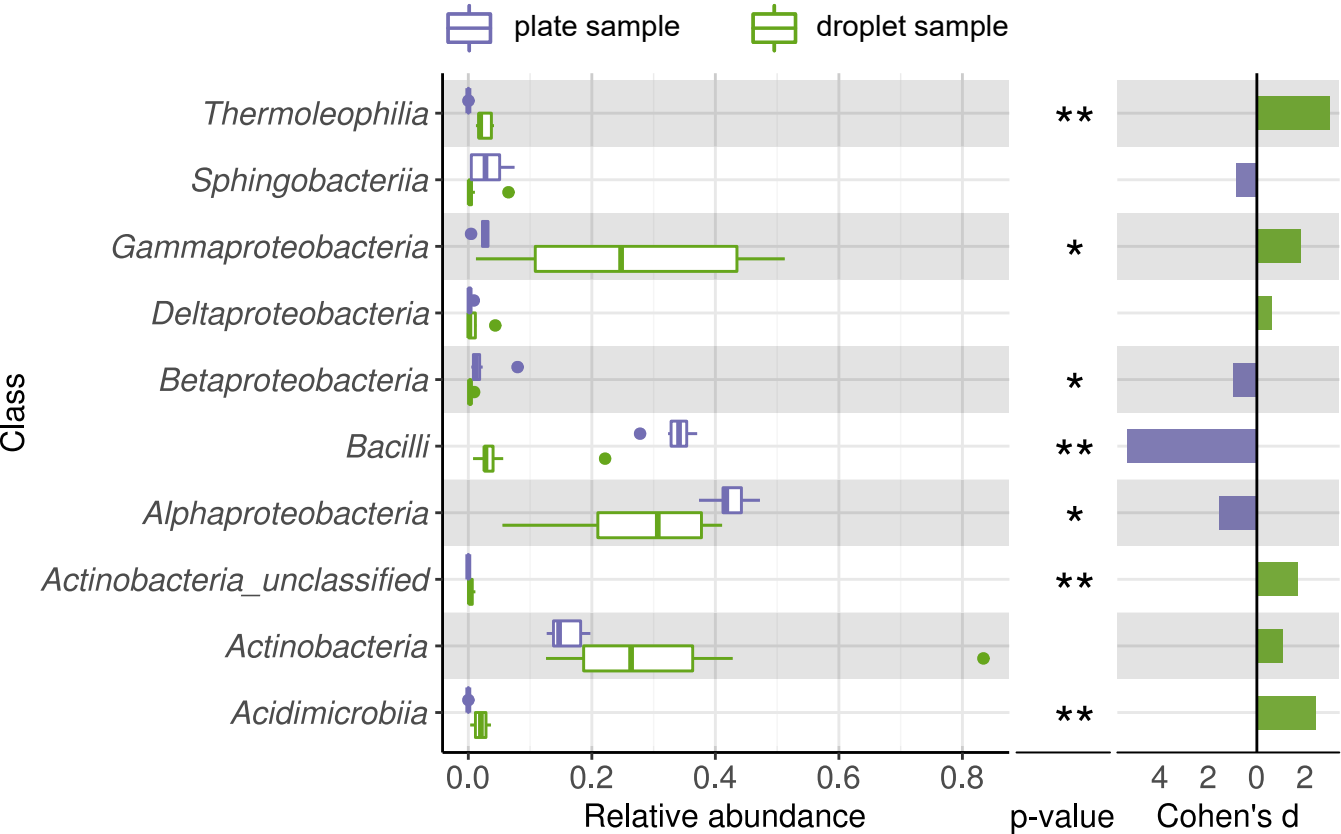

Supplement: supp [file elife-64774-supp-v1.zip]

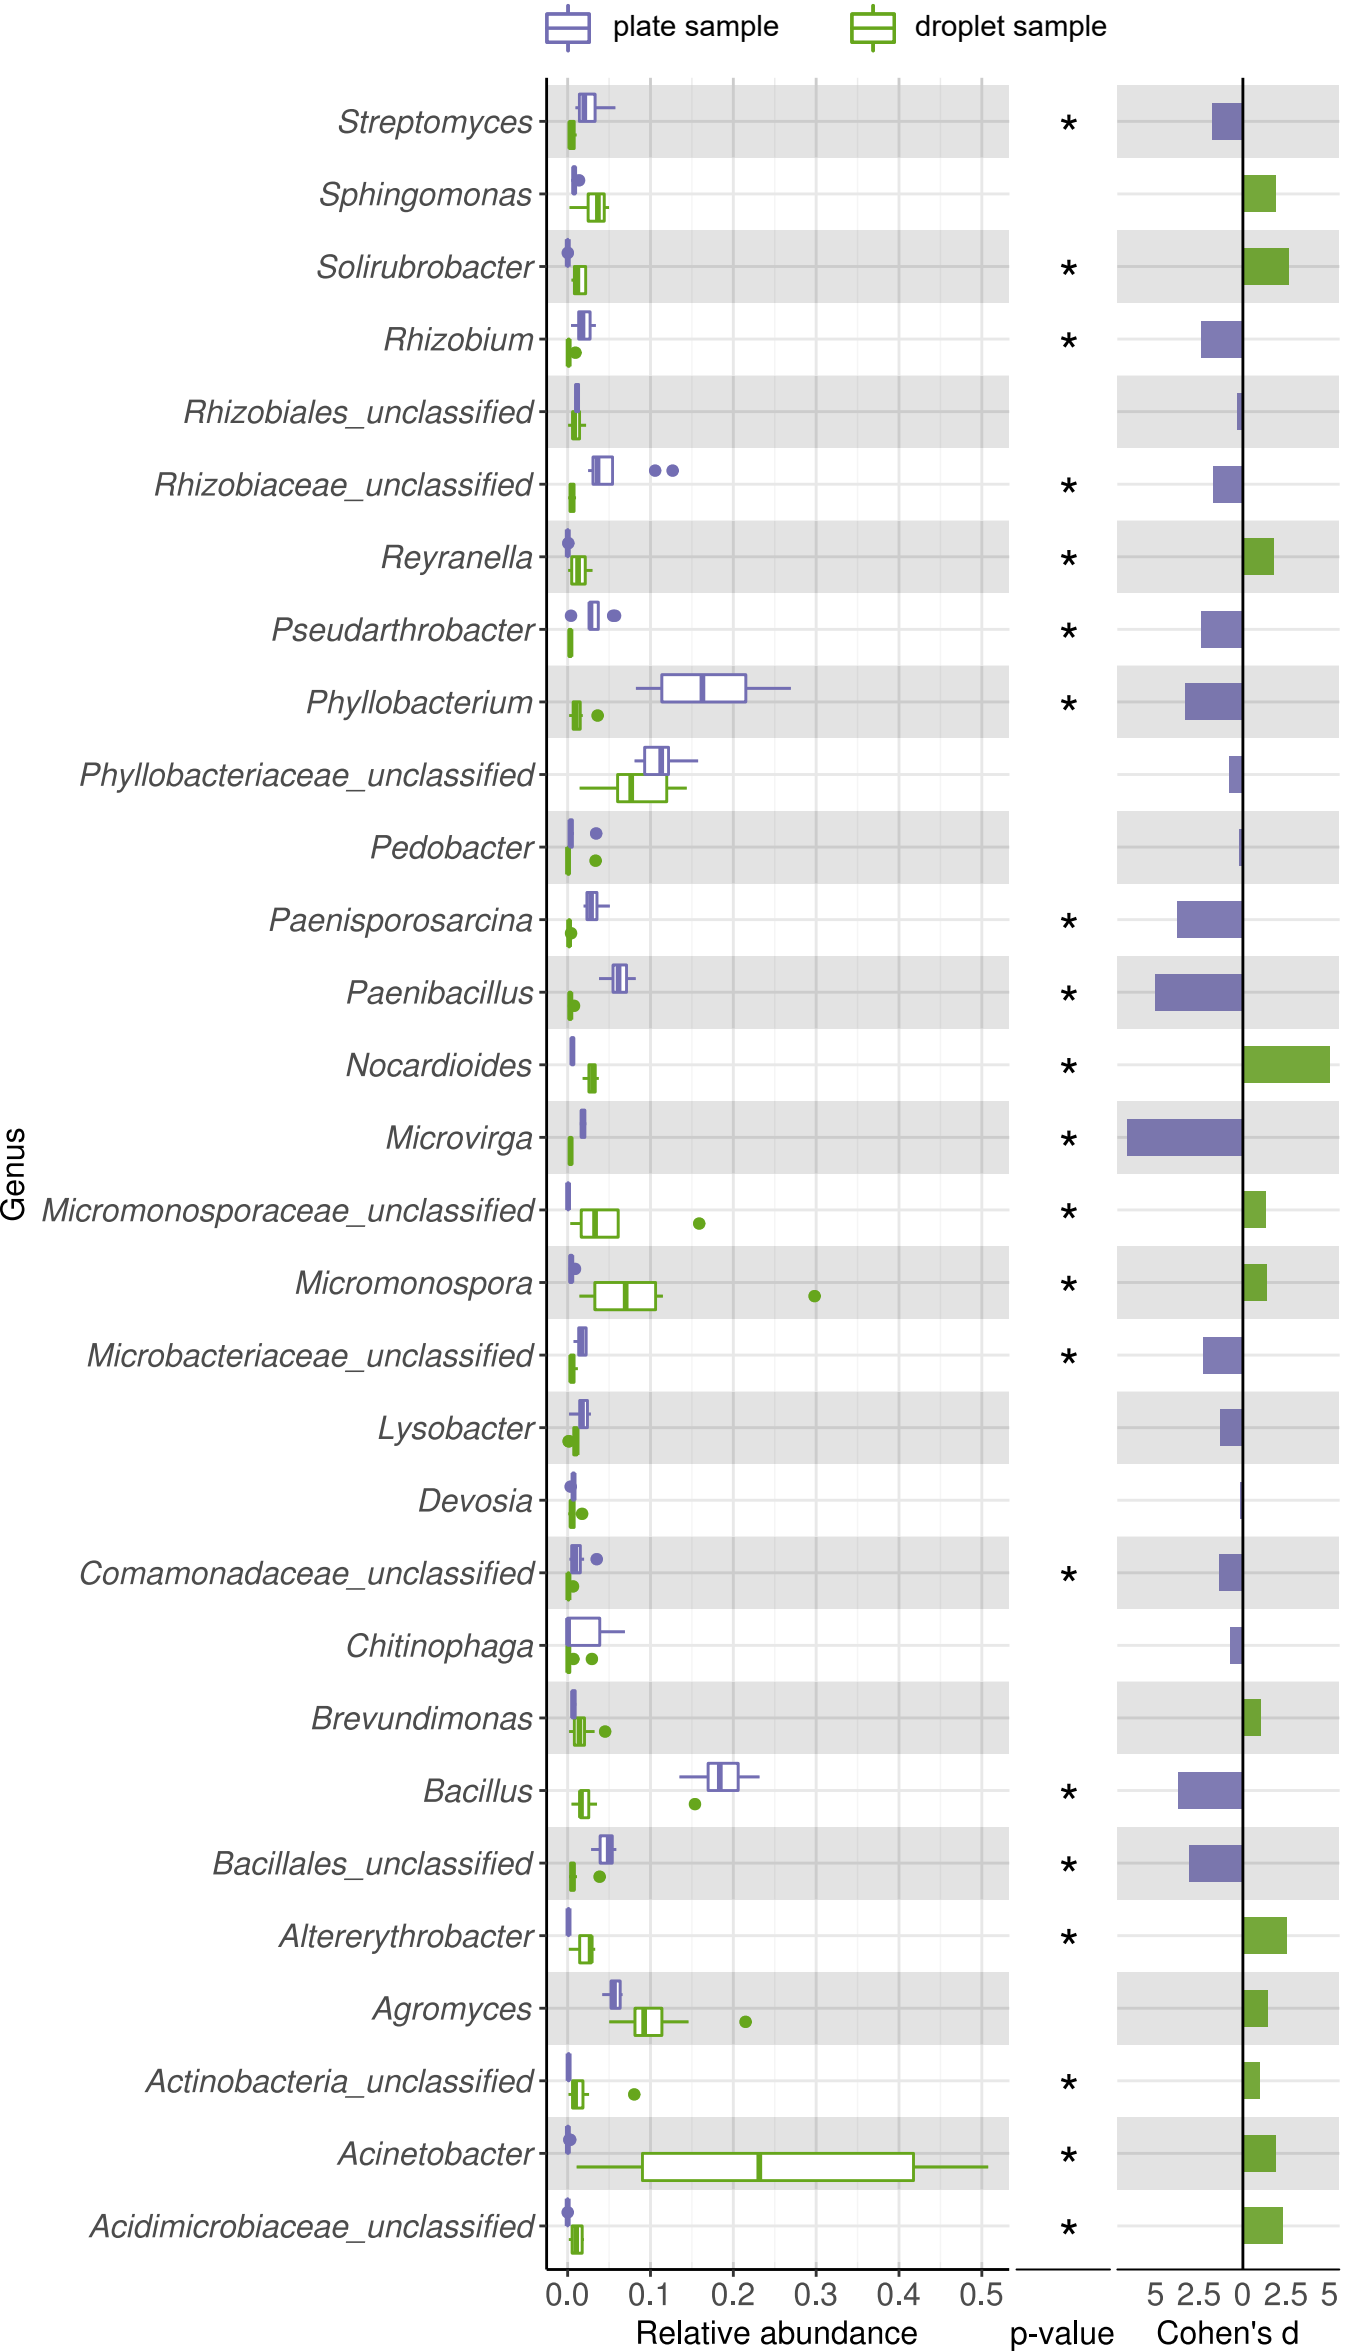

Supplement: supp [file elife-64774-supp-v1.zip]

A) *Penicillium notatum*

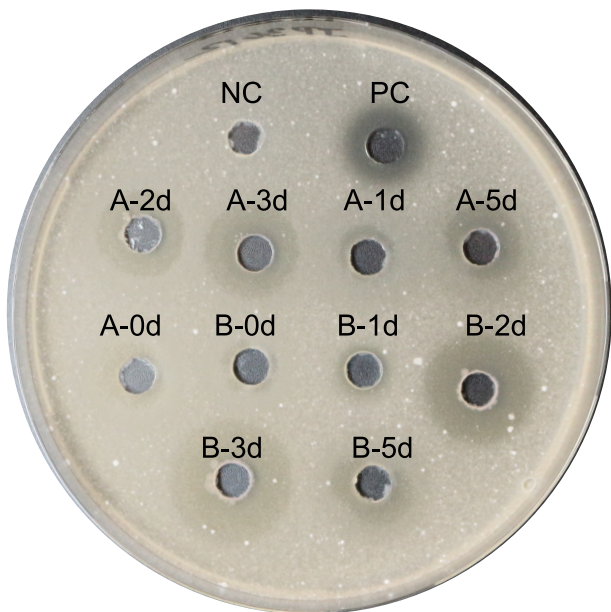

B) *Candida albicans*

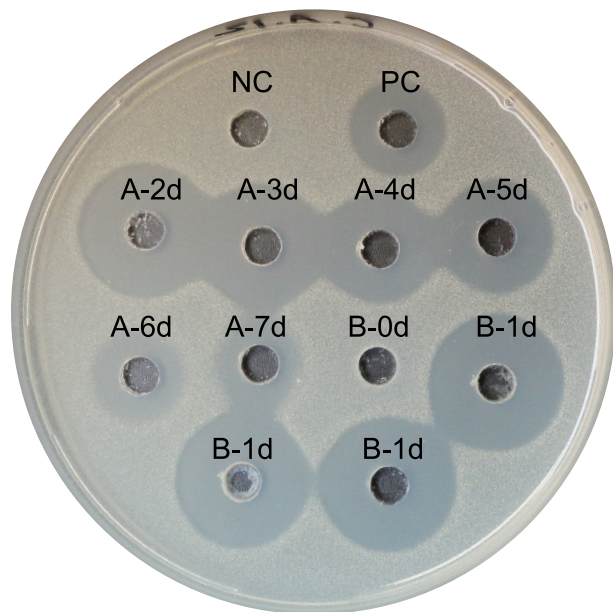

C) *Bacillus subtilis*

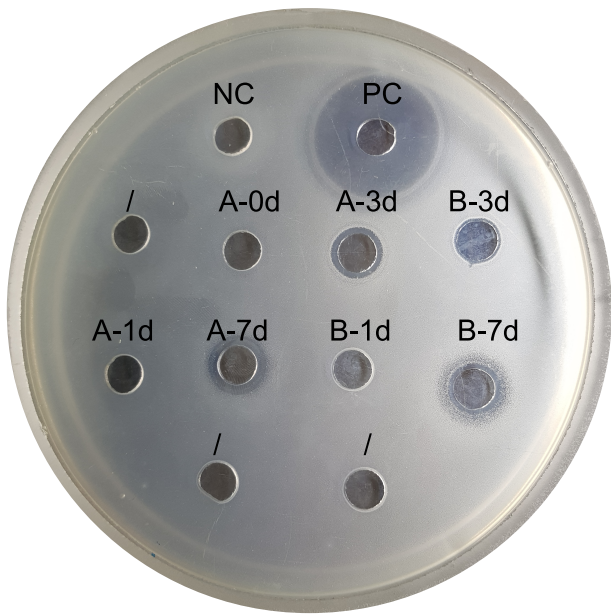

D) *Mycobacterium vaccae*

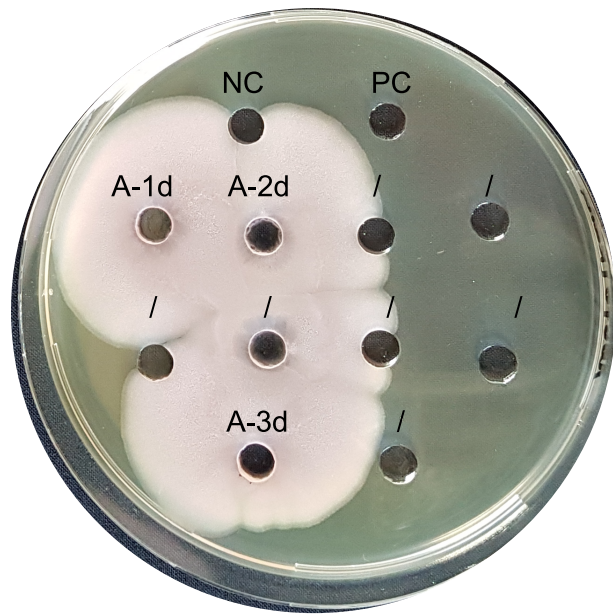

Supplement: supp [file elife-64774-supp-v1.zip]
